# Supplementary material for: Culture impact on the transcriptomic programs of primary and iPSC-derived human alveolar type 2 cells
Source: PubMed Central journal article supplement (PMC9870086; doi:10.1172/jci.insight.158937), 2023-01-10

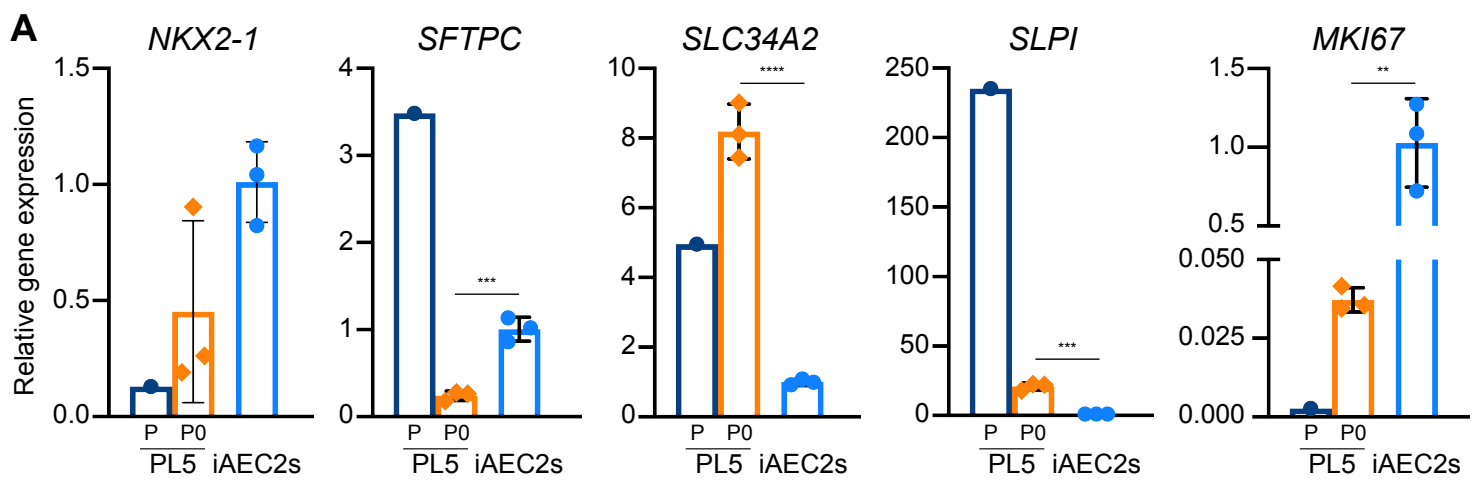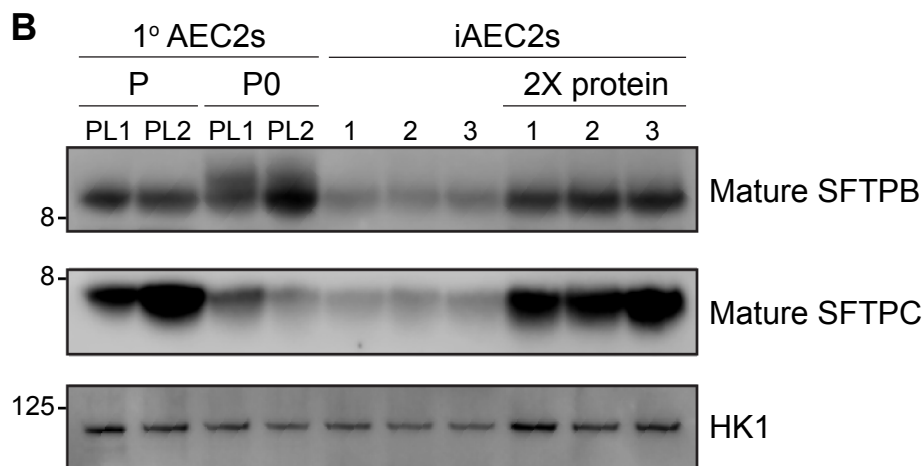

**Supplemental Figure 1. Cultured AEC2s (1° and iAEC2s) acquire a less mature and more proliferative state compared to pre-culture 1° AEC2s, related to Figures 1 and 3.**

(A) RT-qPCR showing fold change in gene expression compared to iAEC2s in pre-culture (P) and cultured (P0) 1° AEC2s from donor PL5, (n=3 experimental replicates). Mean  $\pm$  SD is shown; \*\*p<0.01, \*\*\*p<0.001, \*\*\*\*p<0.0001 by unpaired, two-tailed Student's t-test.

(B) Western blot analyses of 1° AEC2s and iAEC2s for surfactant protein expression. Cell lysates from pre-culture 1° AEC2s (P), matched cultured 1° AEC2s (P0), and iAEC2s (n=3) were subjected to SDS PAGE and western blotting as described in the Methods. To control for the presence of serum in 1° AEC2s samples, total protein loading of each lane was varied to normalize each sample to constant intracellular protein content based on GAPDH content. After transfer, mature SFTPB and SFTPC were detected using previously described immunoreagents. Equal loading was confirmed by probing for the housekeeping gene Hexokinase 1 (HK1). The three lanes at the right represent duplicate iAEC2 lysates for which loading was increased as indicated to further demonstrate the presence of fully processed SFTPB and SFTPC isoforms.

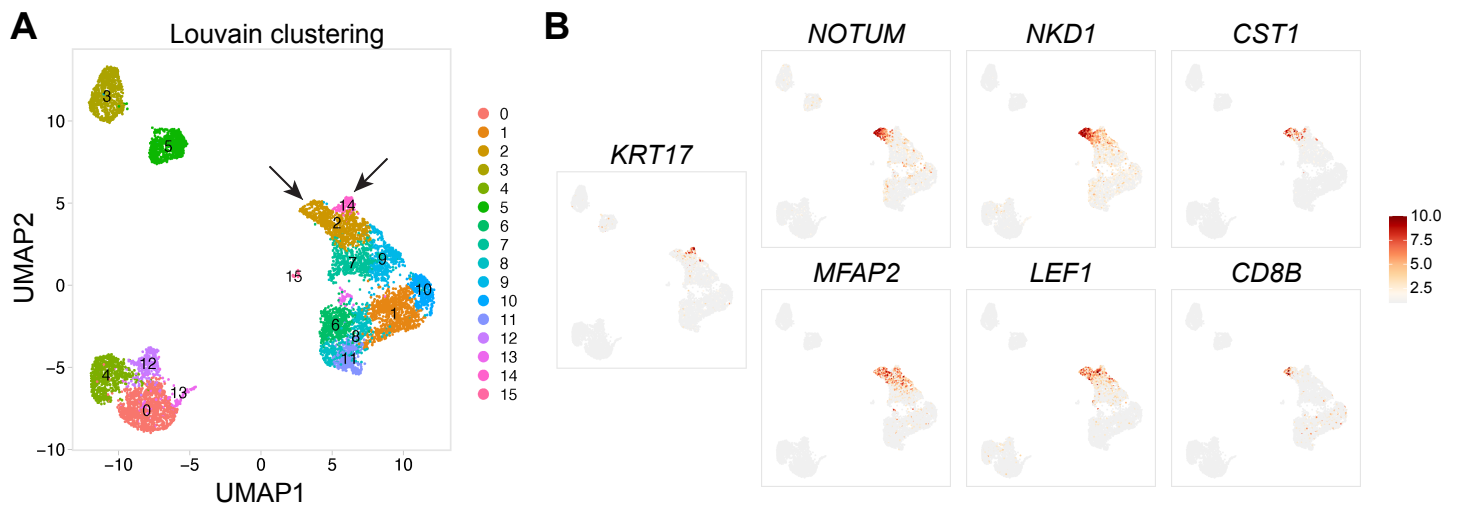

**Supplemental Figure 2. Cluster 2 cells are closely related to cluster 14 cells and represent a subset of the transitional cell state, related to Figures 2, 7, and 8.**

(A) Louvain clustering of cell transcriptomes showing 16 different clusters similar to Figure 2B. Arrows indicate clusters 2 and 14, respectively.

(B) Normalized gene expression overlaid on UMAP plots showing transcripts upregulated in cluster 2.

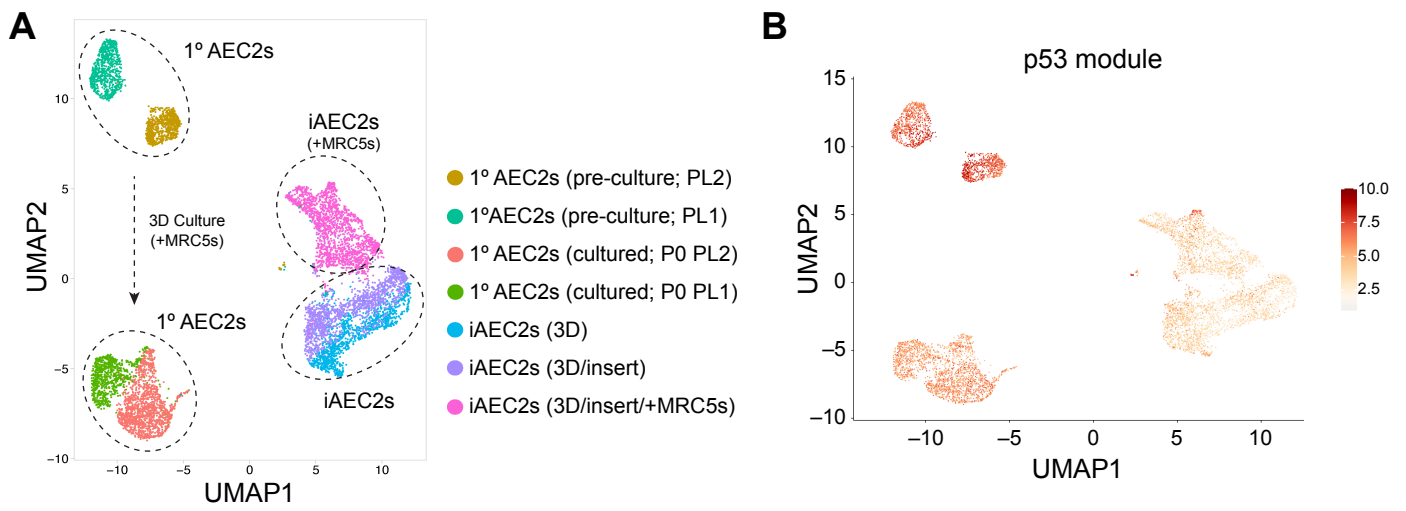

**Supplemental Figure 3. Enriched expression of a p53 module score in cultured 1° AEC2s vs iAEC2s, related to Figures 4 and 5.**

(A) Visualization of pre-culture 1° AEC2s, cultured 1° AEC2s, and iAEC2s scRNA-seq transcriptomes using Uniform Manifold Approximation Projection (UMAP) similar to Figure 2A.

(B) Normalized gene expression overlaid on UMAP plots for the p53 module generated using the Hallmark p53 pathway gene list.

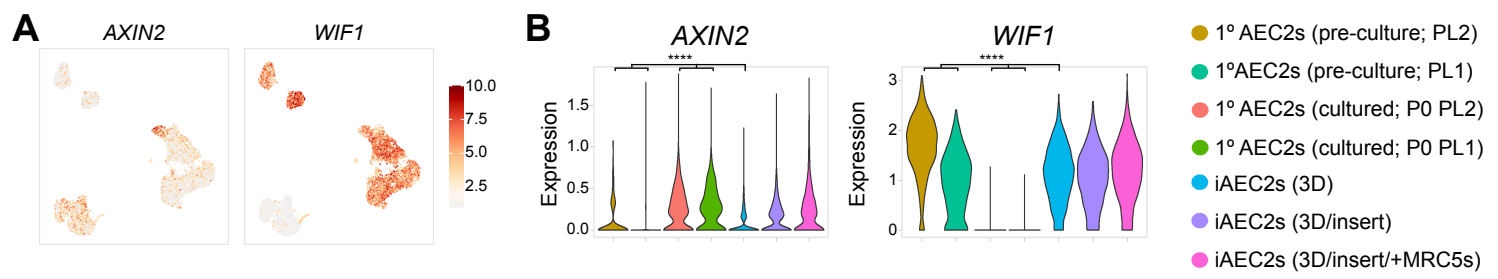

**Supplemental Figure 4. Wnt-related genes profiled across samples, related to Figure 5.**

(A) Normalized gene expression overlaid on UMAP plots for Wnt target genes *AXIN2* and *WIF1*.

(B) Violin plots showing normalized expression for the Wnt target genes *AXIN2* and *WIF1* in pre-culture 1° AEC2s, cultured 1° AEC2s, and iAEC2s by scRNA-seq. \*\*\*\* $p < 0.0001$  by one-way ANOVA with Bonferroni correction for multiple comparisons.

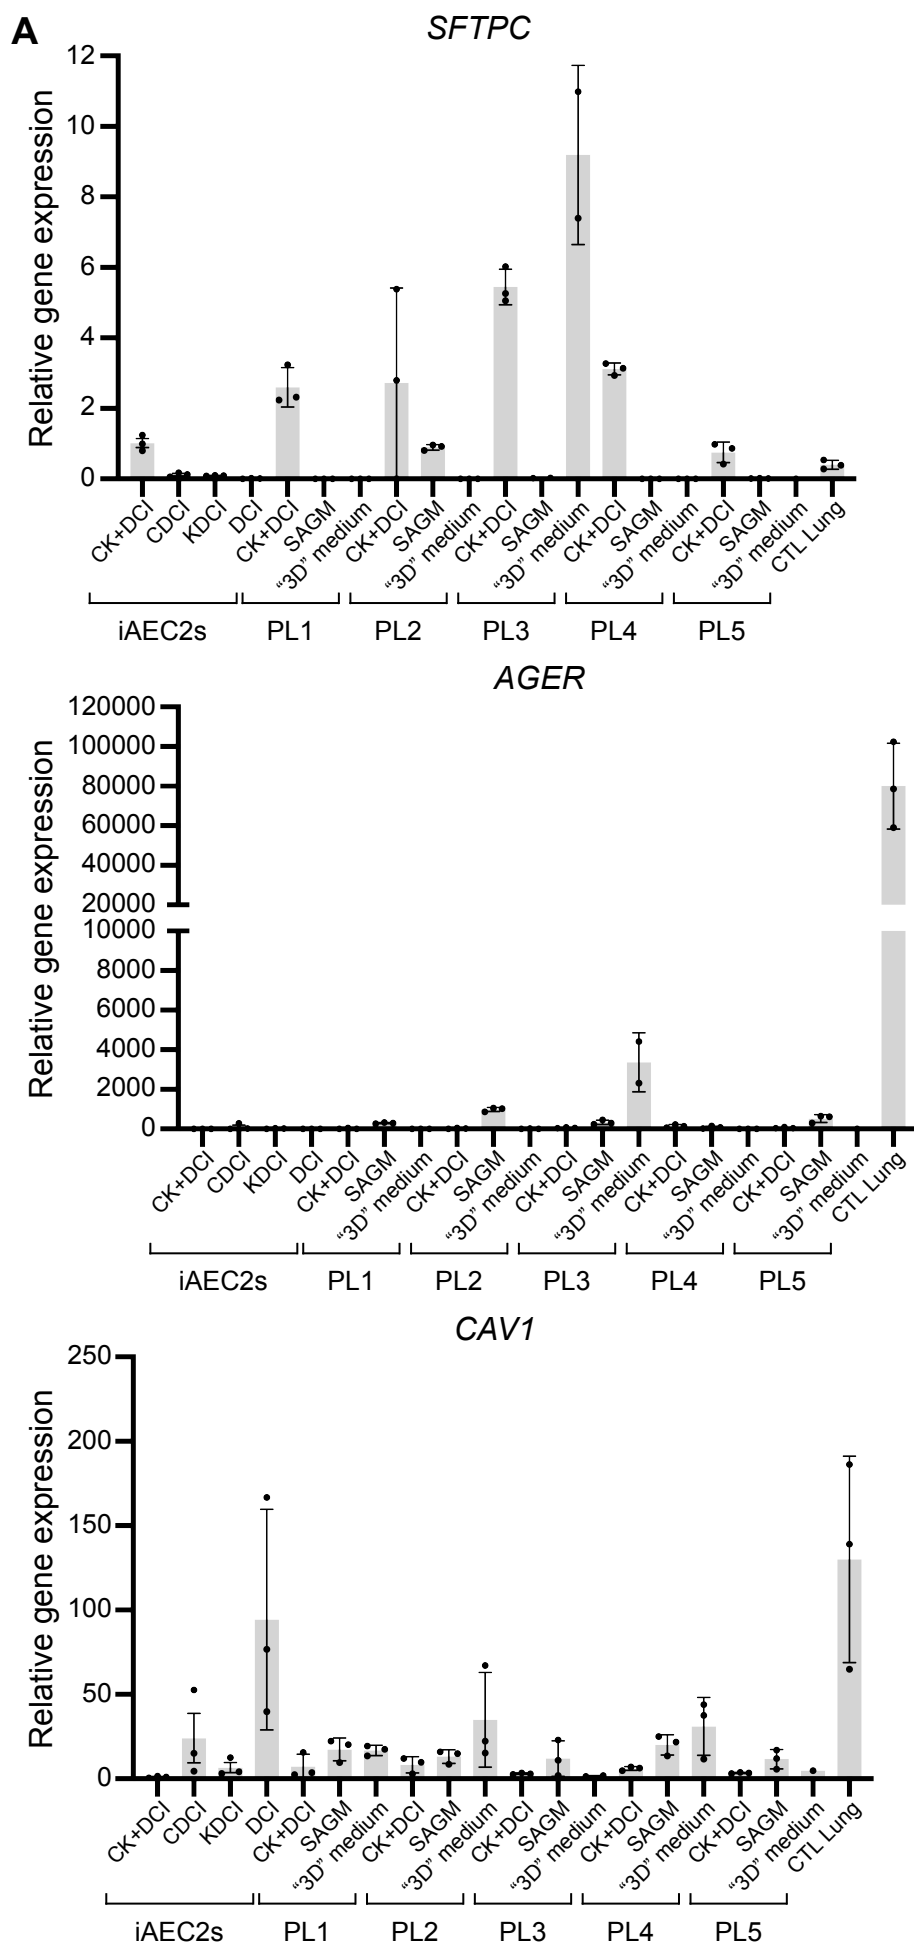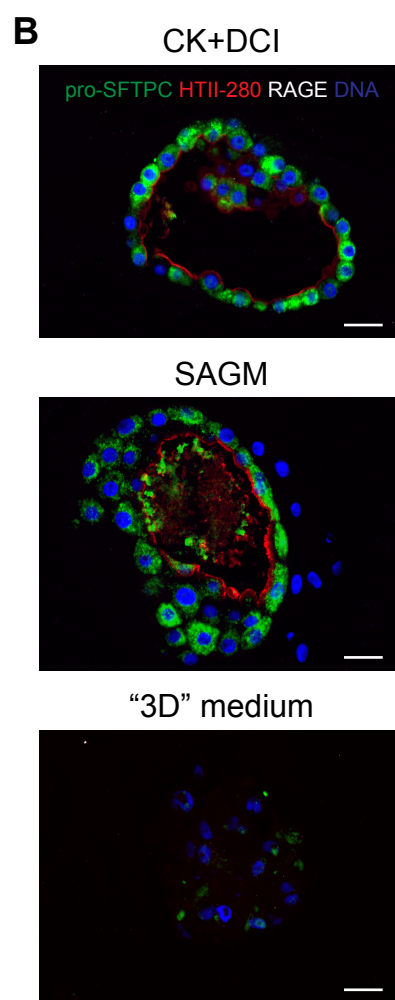

**Supplemental Figure 5. Absence of expression of the AEC1 molecular phenotype in the evaluated AEC2 culture models, related to Figure 6.**

(A) RT-qPCR showing fold change in gene expression compared to iAEC2s cultured in CK+DCI medium in iAEC2s cultured in CDCI, KDCI, or DCI medium as well as 1° AEC2s from 5 different donors (PL 1-5) cultured in CK+DCI medium, SAGM, or "3D" medium. Note the highest expression of the AEC2-specific transcript *SFTPC* in CK+DCI medium compared to other media across all samples and that no condition is associated with emergence of the full AEC1 phenotype in either 1° or iPSC-derived cultured AEC2s based on low or no expression of the AEC1-specific transcripts *AGER* and *CAV1* when compared to an adult human distal lung explant control (CTL Lung).

(B) Representative immunofluorescence microscopy of 1° AEC2 organoids (from donor PL2) cultured in the indicated media for pro-SFTPC (green), HTII-280 (red), RAGE (white), and DNA (Hoechst, blue). Scale bars: 25  $\mu$ m. The lack of RAGE positive cells suggests that 1° AEC2s do not differentiate to AEC1s in these culture conditions.

**Supplemental Table 1. Flow Cytometric Analysis Antibodies.**

| <b>Antibody</b>    | <b>Fluorochrome</b> | <b>Clone</b> | <b>Catalog Number</b> | <b>Manufacturer</b>   |
|--------------------|---------------------|--------------|-----------------------|-----------------------|
| EPCAM/CD326        | PE-Cy7              | 9C4          | 324222                | BioLegend             |
| CD26               | PE                  | BA5b         | 302705                | BioLegend             |
| CD31               | PE                  | WM59         | 303106                | BioLegend             |
| CD45               | PE                  | HI30         | 304012                | BioLegend             |
| CD47               | PerCP-Cy5.5         | CC2C6        | 323110                | BioLegend             |
| Mouse IgG1 isotype | PE                  | MOPC-21      | 400113                | BioLegend             |
| Mouse IgG1 isotype | PerCP-Cy5.5         | MOPC-21      | 400149                | BioLegend             |
| HTII-280           | N/A                 | N/A          | TB-27AHT2-280         | Terrace Biotechnology |
| Rat anti-mouse IgM | FITC                | RMM-1        | 406505                | BioLegend             |
| NKX2-1/TTF1        | N/A                 | EP15847      | ab76013               | Abcam                 |

**Supplemental Table 2. Antibodies.**

| <b>Immunofluorescence</b>                                            |                  |                 |                       |                          |
|----------------------------------------------------------------------|------------------|-----------------|-----------------------|--------------------------|
| <b>Antibody</b>                                                      | <b>Clonality</b> | <b>Dilution</b> | <b>Catalog Number</b> | <b>Manufacturer</b>      |
| E-Cadherin/CDH1                                                      | Monoclonal       | 1:100           | 610181                | BD Biosciences           |
| HTII-280                                                             | Monoclonal       | 1:100           | TB-27AHT2-280         | Terrace Biotechnology    |
| Pro-SFTPC                                                            | Polyclonal       | 1:1000          | WRAB-9337             | Seven Hills Bioreagents  |
| RAGE                                                                 | Polyclonal       | 1:100           | AF1145                | R&D Systems              |
| Recombinant Alexa Fluor 647 Anti-Cytokeratin 8/KRT8 (clone EP1628Y)  | Monoclonal       | 1:100           | ab192468              | Abcam                    |
| Recombinant Alexa Fluor 488 Anti-Cytokeratin 17/KRT17 (clone EP1623) | Monoclonal       | 1:100           | ab185032              | Abcam                    |
| Donkey anti-Goat IgG (H+L), Alexa Fluor Plus 594 conjugated          | Polyclonal       | 1:500           | A32758                | Thermo Fisher Scientific |
| Donkey anti-Mouse IgG (H+L), Alexa Fluor Plus 594 conjugated         | Polyclonal       | 1:500           | A32744                | Thermo Fisher Scientific |
| Donkey anti-Rabbit IgG (H+L), Alexa Fluor Plus 488 conjugated        | Polyclonal       | 1:500           | A32790                | Thermo Fisher Scientific |
| ProLong Gold Antifade Mountant                                       | N/A              | N/A             | P36934                | Thermo Fisher Scientific |
| <b>Western Blot</b>                                                  |                  |                 |                       |                          |
| SFTPB                                                                | Polyclonal       | 1:2500          | PT3                   | (1)                      |
| Mature SFTPC                                                         | Polyclonal       | 1:1000          | WRAB-76694            | Seven Hills              |
| Hexokinase 1                                                         | Polyclonal       | 1:2500          | 19662-1-AP            | Proteintech              |
| Goat Anti-Rabbit IgG (H + L)-HRP Conjugate                           |                  | 1:10000         | 170-6515              | Bio-Rad                  |
|                                                                      |                  |                 |                       |                          |
|                                                                      |                  |                 |                       |                          |
|                                                                      |                  |                 |                       |                          |

1. Beers MF, Bates SR, Fisher AB. Differential extraction for the rapid purification of bovine surfactant protein B. *Am J Physiol* 1992;262(6 Pt 1):L773-8.

| <b>Supplemental Table 3. Oligonucleotides</b>  |                          |               |
|------------------------------------------------|--------------------------|---------------|
| TaqMan Gene Expression Assay Primer/Probe Sets |                          |               |
| <i>AGER</i>                                    | Thermo Fisher Scientific | Hs00542584_g1 |
| <i>CAV1</i>                                    | Thermo Fisher Scientific | Hs00971716_m1 |
| <i>KRT8</i>                                    | Thermo Fisher Scientific | Hs01670053_m1 |
| <i>KRT17</i>                                   | Thermo Fisher Scientific | Hs00356958_m1 |
| <i>NKX2-1</i>                                  | Thermo Fisher Scientific | Hs00968940_m1 |
| <i>PDPN</i>                                    | Thermo Fisher Scientific | Hs00366766_m1 |
| <i>SFTPC</i>                                   | Thermo Fisher Scientific | Hs00161628_m1 |
| <i>SLC34A2</i>                                 | Thermo Fisher Scientific | Hs00197519_m1 |
| <i>18S</i>                                     | Thermo Fisher Scientific | 4318839       |



SFTPb

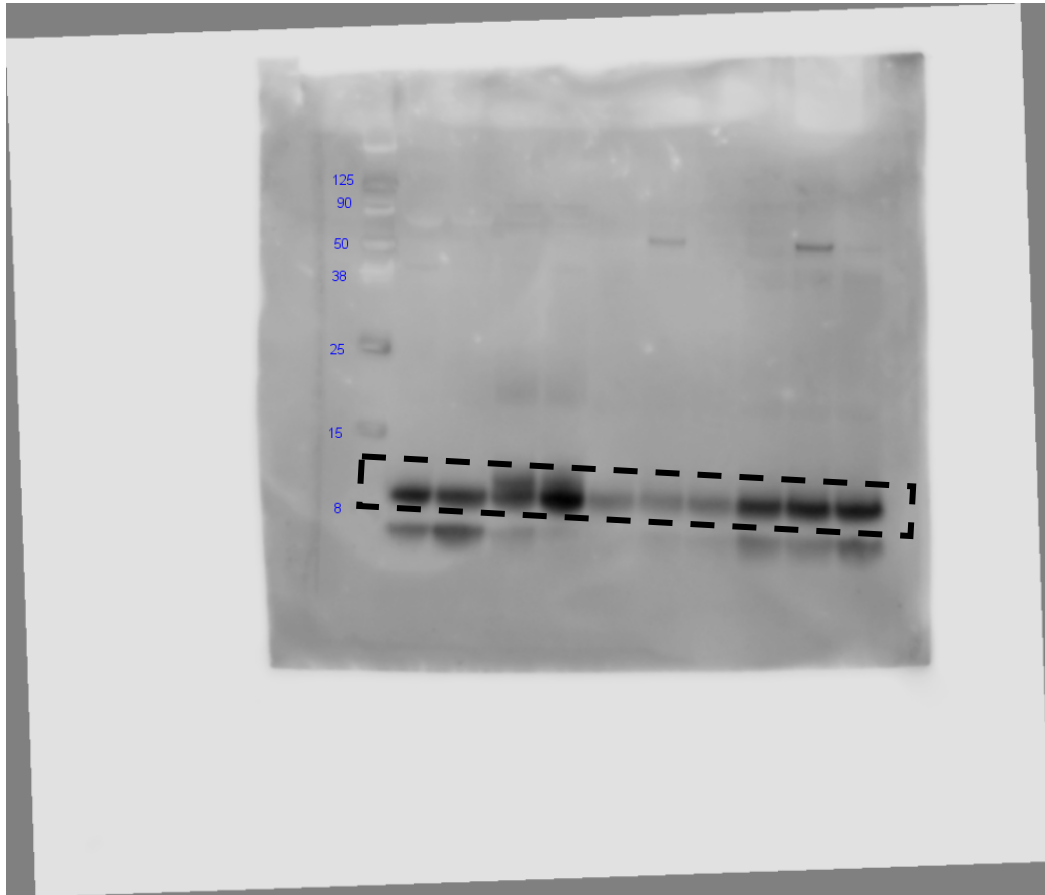

SFTPc

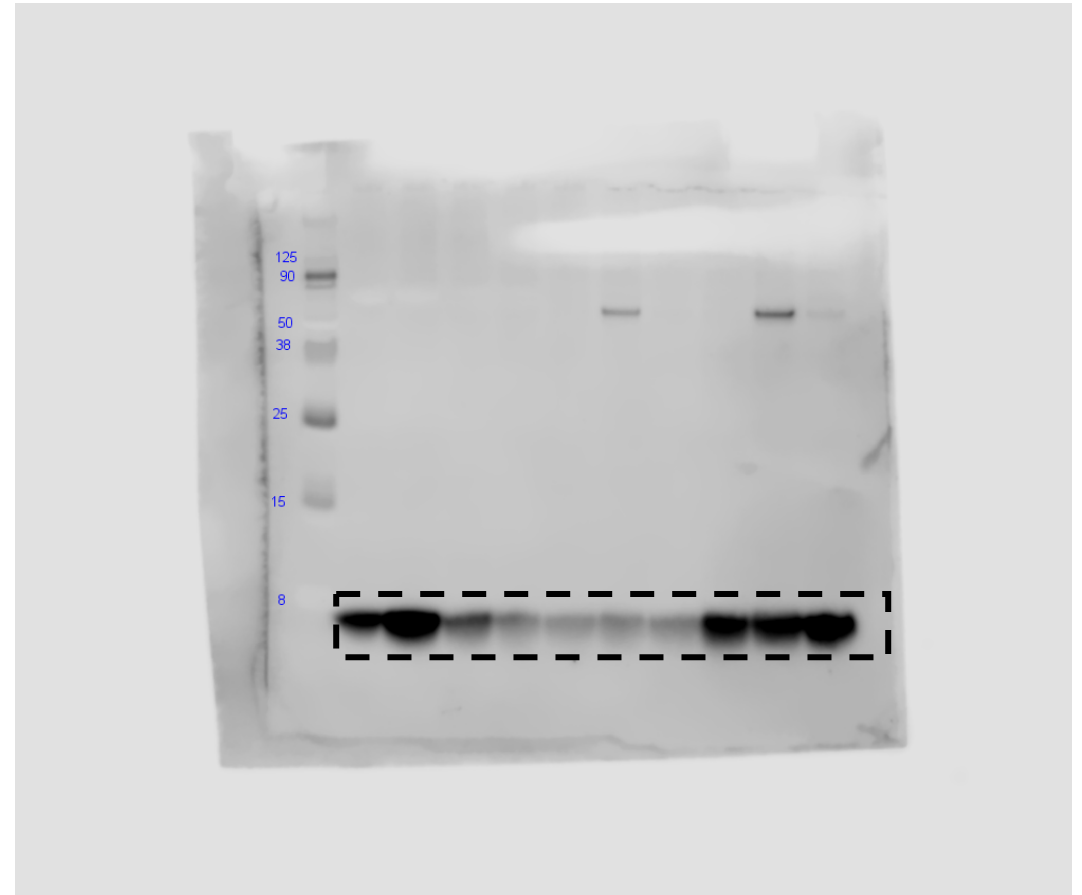

**GAPDH**

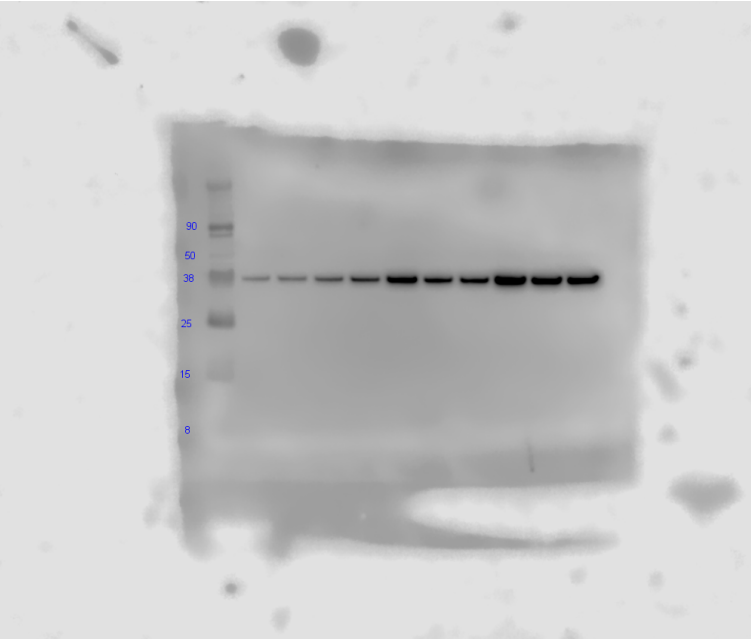

**HK1**

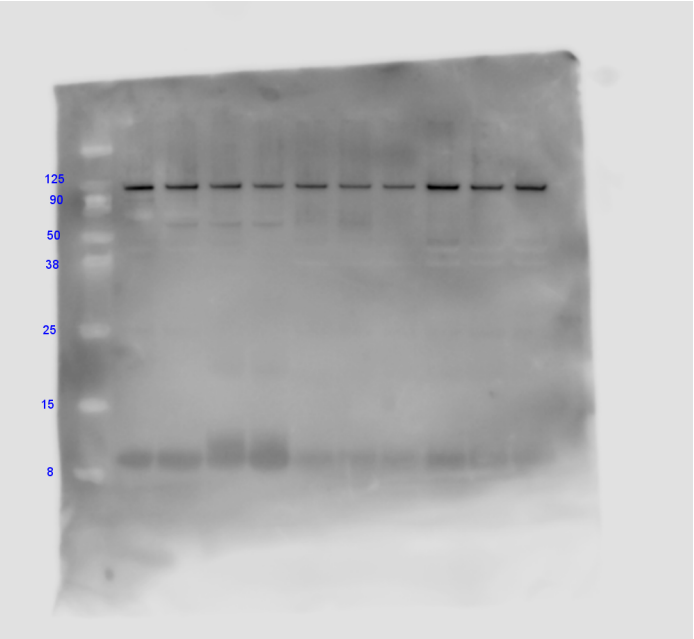

**Total Protein**

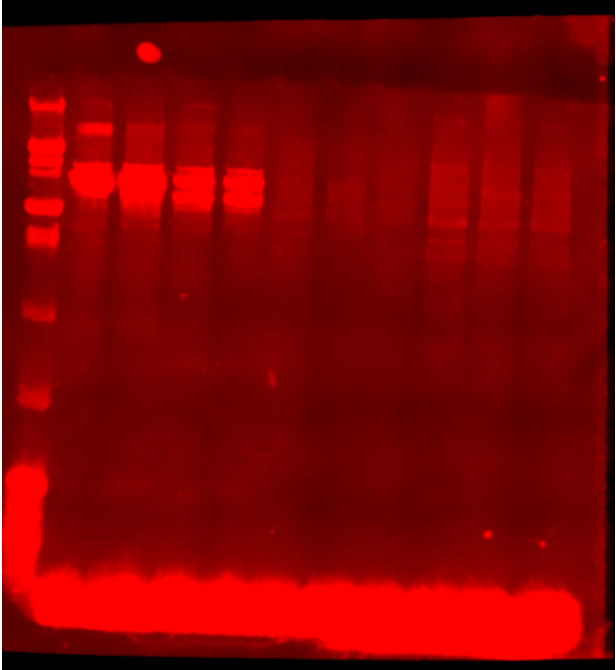

Supplement: jciinsight-8-158937-s055.pdf [file jciinsight-8-158937-s055.pdf]
